# Supplementary material for: Comparison of Inter-Method Agreement and Reliability for Automatic Brain Volumetry Using Three Different Clinically Available Software Packages
Source: MDPI journal article supplement (doi:10.3390/medicina60050727), 2024-04-27
Supplement: s1 [file s1]

## Supportive/Supplementary Material

**Table S1. Comparison of the mean bias and 95% limits of agreement (LOA) for total intracranial volume between the three volumetry software packages**

|        | NQ vs. FS |                | NQ vs. HAD |                 | FS vs. HAD |                 |
|--------|-----------|----------------|------------|-----------------|------------|-----------------|
|        | Mean Bias | 95% LOA        | Mean Bias  | 95% LOA         | Mean Bias  | 95% LOA         |
| Total  | 12.96     | -90.72, 116.65 | 45.90      | -104.97, 196.78 | 32.95      | -74.41, 140.30  |
| Non-AD | 27.20     | -82.55, 136.95 | 53.67      | -127.12, 234.46 | 26.47      | -108.71, 161.65 |
| AD     | -6.55     | -88.42, 75.51  | 35.32      | -59.88, 130.53  | 41.78      | -3.73, 87.28    |

Note— AD, Alzheimer's disease; FS, FreeSurfer; HAD, Heuron AD; LOA, limits of agreement; NQ, NeuroQuant

**Table S2. Comparison of the mean bias and 95% limits of agreement (LOA) for measured volumes in each brain region between the three volumetry software packages.**

|                    | Lt. hemisphere |               |            |              |            |              | Rt. hemisphere |              |            |              |            |              |
|--------------------|----------------|---------------|------------|--------------|------------|--------------|----------------|--------------|------------|--------------|------------|--------------|
|                    | NQ vs. FS      |               | NQ vs. HAD |              | FS vs. HAD |              | NQ vs. FS      |              | NQ vs. HAD |              | FS vs. HAD |              |
|                    | Mean Bias      | 95% LOA       | Mean Bias  | 95% LOA      | Mean Bias  | 95% LOA      | Mean Bias      | 95% LOA      | Mean Bias  | 95% LOA      | Mean Bias  | 95% LOA      |
| <b>Cortical GM</b> |                |               |            |              |            |              |                |              |            |              |            |              |
| Total              | 15.87          | -11.28, 43.03 | 41.96      | 13.38, 70.54 | 26.09      | 1.81, 50.36  | 17.30          | -9.56, 44.17 | 42.21      | 13.25, 71.18 | 24.90      | 2.14, 47.66  |
| Non-AD             | 21.78          | -7.19, 50.76  | 42.69      | 11.66, 73.71 | 20.91      | -0.68, 42.49 | 21.78          | -8.17, 51.72 | 42.09      | 10.70, 73.49 | 20.32      | -1.40, 42.03 |
| AD                 | 7.82           | -5.41, 21.05  | 40.98      | 15.77, 66.18 | 33.16      | 12.32, 53.99 | 11.22          | -4.56, 27.00 | 42.37      | 16.62, 68.12 | 31.15      | 13.00, 49.31 |
| <b>Cerebral WM</b> |                |               |            |              |            |              |                |              |            |              |            |              |
| Total              | 17.00          | 16.99, 17.01  | 7.72       | -5.79, 21.23 | -9.28      | -22.79, 4.23 | 22.40          | 22.40, 22.41 | 9.66       | -6.00, 25.32 | -12.74     | -28.40, 2.92 |
| Non-AD             | 17.00          | 16.99, 17.00  | 5.28       | -5.24, 15.80 | -11.72     | -22.24, 1.20 | 22.40          | 22.40, 22.41 | 7.08       | -4.98, 19.14 | -15.33     | -27.39, 3.27 |
| AD                 | 17.00          | 17.00, 17.01  | 11.05      | -3.48, 25.57 | -5.95      | -20.48, 8.57 | 22.40          | 22.40, 22.41 | 13.18      | -4.28, 30.64 | -9.22      | -26.68, 8.24 |
| <b>Hippocampus</b> |                |               |            |              |            |              |                |              |            |              |            |              |
| Total              | -0.23          | -0.99, 0.53   | -0.57      | -1.74, 0.61  | -0.34      | -1.08, 0.42  | -0.28          | -1.14, 0.58  | -0.56      | -2.03, 0.92  | -0.28      | -1.16, 0.61  |
| Non-AD             | -0.10          | -0.92, 0.72   | -0.34      | -1.65, 0.97  | -0.24      | -1.08, 0.60  | -0.12          | -1.03, 0.79  | -0.22      | -1.72, 1.27  | -0.10      | -0.92, 0.72  |

|          |       |             |       |             |             |       |             |             |             |             |             |       |             |             |       |             |
|----------|-------|-------------|-------|-------------|-------------|-------|-------------|-------------|-------------|-------------|-------------|-------|-------------|-------------|-------|-------------|
| AD       | -0.41 | -0.91, 0.95 | -0.88 | -1.45, 0.31 | -           | -0.47 | -0.99, 0.06 | -0.50       | -1.06, 0.06 | -1.01       | -1.88, 0.15 | -     | -0.51       | -1.27, 0.25 |       |             |
| Amygdala |       |             |       |             |             |       |             |             |             |             |             |       |             |             |       |             |
| Total    | 0.14  | -0.21, 0.50 | -0.03 | -0.48, 0.42 |             | -0.17 | -0.54, 0.19 | -0.11       | -0.45, 0.23 | -0.26       | -0.64, 0.13 |       | -0.15       | -0.43, 0.14 |       |             |
| Non-AD   | 0.14  | -0.26, 0.54 | -0.01 | -0.52, 0.50 |             | -0.15 | -0.59, 0.29 | -0.11       | -0.50, 0.29 | -2.30       | -0.71, 0.11 |       | -0.19       | -0.46, 0.07 |       |             |
| AD       | 0.15  | -0.15, 0.44 | -0.06 | -0.41, 0.28 |             | -0.21 | -0.41, 0.00 | -0.11       | -0.35, 0.13 | -0.20       | -0.51, 0.11 |       | -0.09       | -0.35, 0.18 |       |             |
| Caudate  |       |             |       |             |             |       |             |             |             |             |             |       |             |             |       |             |
| Total    | -0.98 | -0.92, 0.72 | -0.24 | -1.13, 0.66 |             | -0.14 | -0.73, 0.45 | 0.07        | -1.13, 1.28 | -0.21       | -1.08, 0.66 |       | -0.28       | -1.04, 0.48 |       |             |
| Non-AD   | -0.19 | -1.06, 0.68 | -0.27 | -1.26, 0.72 |             | -0.08 | -0.68, 0.53 | -0.002      | -0.97, 0.96 | -0.22       | -1.10, 0.67 |       | -0.21       | -0.79, 0.36 |       |             |
| AD       | 0.03  | -0.66, 0.71 | -0.20 | -0.95, 0.56 |             | -0.23 | -0.75, 0.30 | 0.17        | -1.29, 1.64 | -0.20       | -1.05, 0.66 |       | -0.37       | -1.32, 0.57 |       |             |
| Putamen  |       |             |       |             |             |       |             |             |             |             |             |       |             |             |       |             |
| Total    | 1.45  | 0.24, 0.27  | 1.62  | 0.51, 2.73  | 0.16        |       | -0.60, 0.93 | 1.23        | 0.08, 2.38  | 1.45        | 0.16, 2.74  | 0.22  |             | -0.40, 0.83 |       |             |
| Non-AD   | 1.48  | 0.18, 2.77  | 1.76  | 0.57, 2.96  | 0.29        |       | -0.16, 0.73 | 1.29        | -0.04, 2.62 | 1.62        | 0.20, 3.03  | 0.33  |             | -0.10, 0.76 |       |             |
| AD       | 1.42  | 0.31, 2.54  | 1.42  | 0.56, 2.28  | -0.003      |       | -0.97, 0.96 | 1.16        | 0.31, 2.00  | 1.22        | 0.28, 2.16  | 0.07  |             | -0.64, 0.77 |       |             |
| Pallidum |       |             |       |             |             |       |             |             |             |             |             |       |             |             |       |             |
| Total    | -1.43 | -2.10, 0.76 | -     | -1.39       | -1.93, 0.85 | -     | 0.04        | -0.48, 0.57 | -1.42       | -2.05, 0.78 | -           | -1.39 | -1.99, 0.79 | -           | 0.03  | -0.55, 0.60 |
| Non-AD   | -1.35 | -2.06, 0.64 | -     | -1.37       | -1.91, 0.83 | -     | -0.02       | -0.54, 0.50 | -1.33       | -1.82, 0.84 | -           | -1.40 | -1.98, 0.82 | -           | -0.07 | -0.36, 0.23 |

|                   |       |             |       |              |       |              |       |             |       |              |       |             |
|-------------------|-------|-------------|-------|--------------|-------|--------------|-------|-------------|-------|--------------|-------|-------------|
| AD                | -1.55 | -2.08, 1.02 | -1.42 | -1.97, 0.88  | -0.13 | -0.37, 0.62  | -1.53 | -2.27, 0.79 | -1.37 | -2.00, 0.74  | -0.16 | -0.59, 0.91 |
| <b>Thalamus</b>   |       |             |       |              |       |              |       |             |       |              |       |             |
| Total             | 1.05  | 0.20, 1.90  | 1.06  | 0.03, 2.09   | 0.01  | -0.55, 0.57  | 1.12  | 0.02, 2.23  | 1.07  | -0.04, 2.18  | -0.05 | -0.05, 0.40 |
| Non-AD            | 1.12  | 0.21, 2.02  | 1.14  | 0.10, 2.17   | 0.02  | -0.56, 0.59  | 1.15  | -0.08, 2.39 | 1.13  | -0.01, 2.27  | -0.02 | -0.49, 0.44 |
| AD                | 0.96  | 0.22, 1.70  | 0.95  | -0.06, 1.97  | -0.01 | -0.56, 0.54  | 1.08  | 0.17, 1.99  | 0.99  | -0.06, 2.04  | -0.09 | -0.54, 0.36 |
| <b>Cerebellum</b> |       |             |       |              |       |              |       |             |       |              |       |             |
| Total             | 0.74  | -2.67, 4.15 | 4.89  | -2.07, 11.85 | 4.15  | -2.70, 11.01 | 1.32  | -3.04, 5.69 | 4.09  | -2.29, 10.48 | 2.77  | -2.81, 8.34 |
| Non-AD            | 0.87  | -2.90, 4.63 | 4.37  | -2.82, 11.57 | 3.51  | -3.41, 10.43 | 1.18  | -3.31, 5.68 | 3.90  | -2.59, 10.39 | 2.72  | -3.50, 8.94 |
| AD                | 0.56  | -2.32, 3.44 | 5.60  | -0.88, 12.08 | 5.03  | -1.45, 11.52 | 1.51  | -2.70, 5.73 | 4.35  | -1.95, 10.66 | 2.84  | -1.80, 7.48 |

Note— AD, Alzheimer's disease; FS, FreeSurfer; GM, gray matter; HAD, Heuron AD; LOA, limits of agreement; NQ, NeuroQuant; WM, white matter
